# Supplementary material
Source: PubMed Central journal article supplement (PMC1955805)

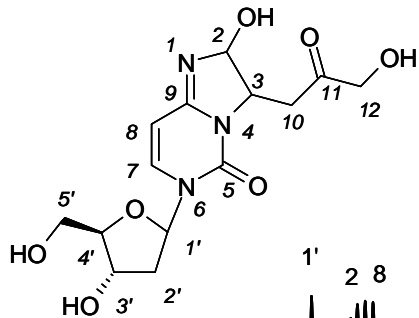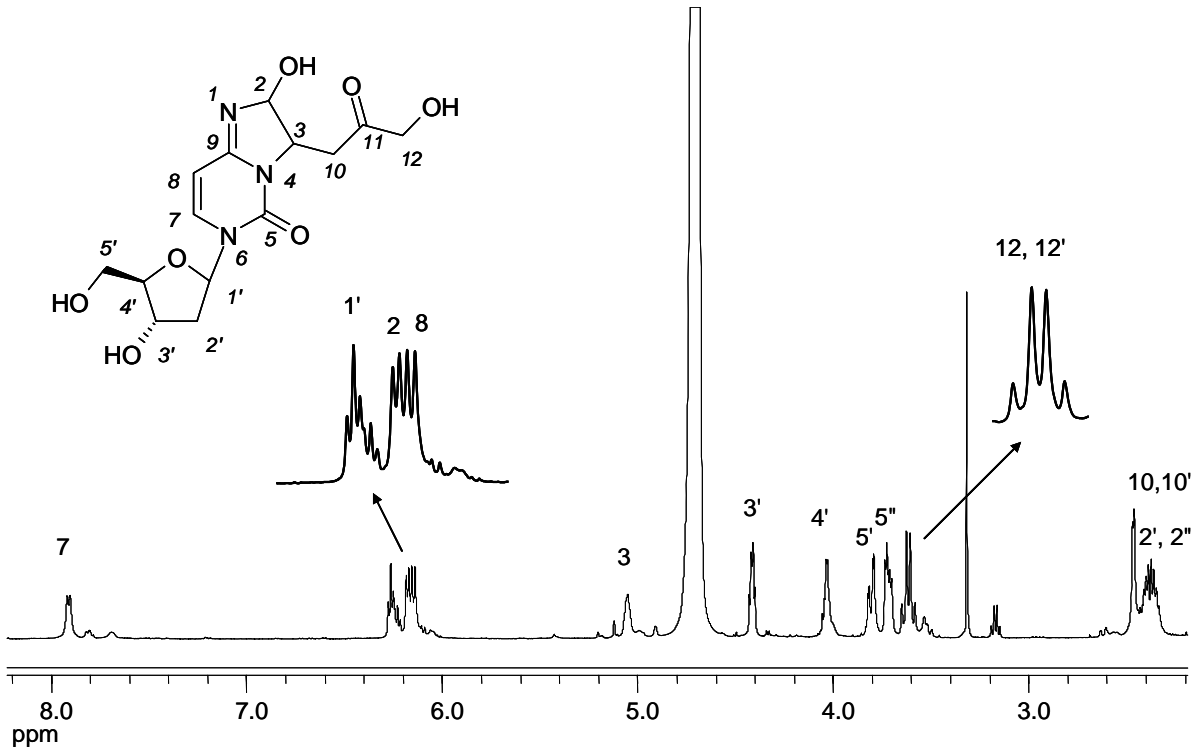

Supplement: pnas_0706044104_1.pdf [file pnas_0706044104_1.pdf]

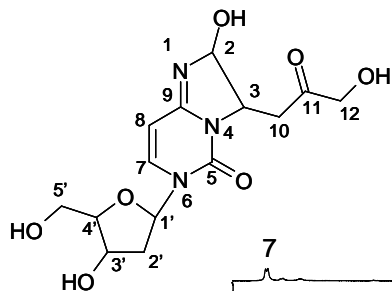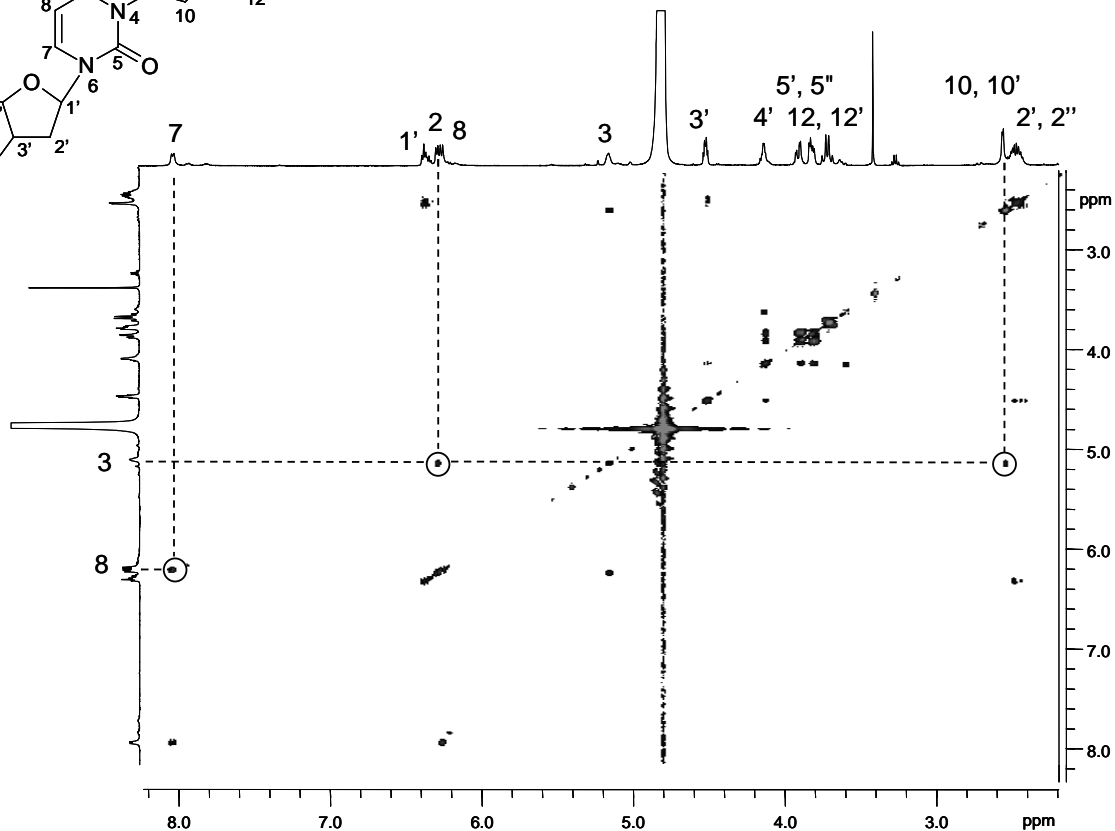

Supplement: pnas_0706044104_2.pdf [file pnas_0706044104_2.pdf]

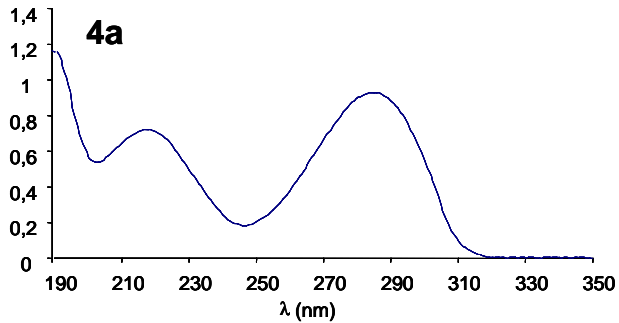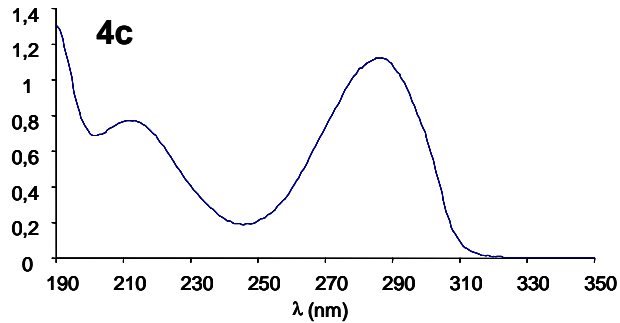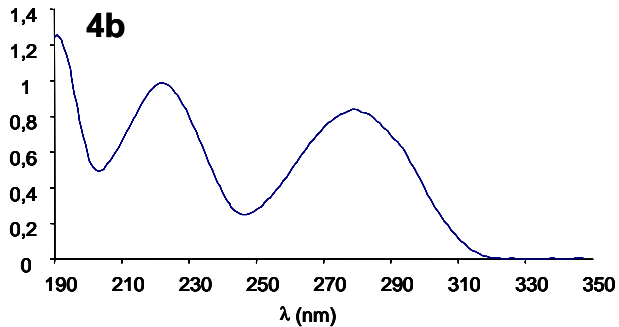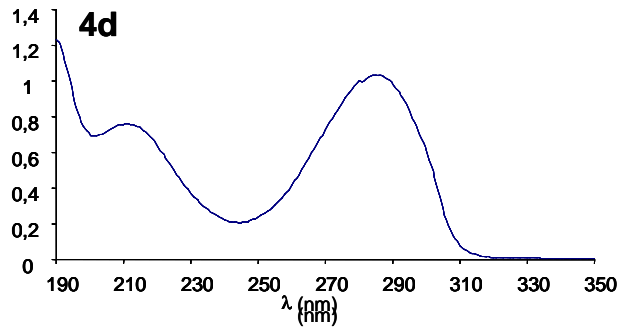

Supplement: pnas_0706044104_3.pdf [file pnas_0706044104_3.pdf]

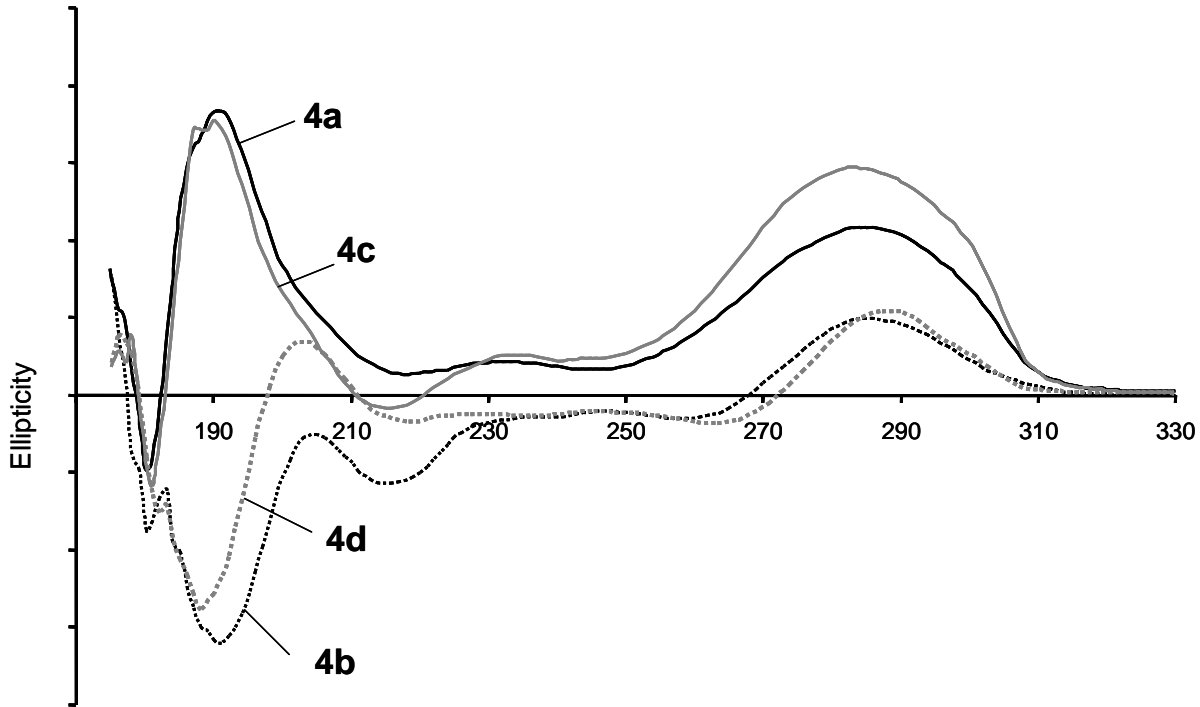

Supplement: pnas_0706044104_4.pdf [file pnas_0706044104_4.pdf]

Relative intensity

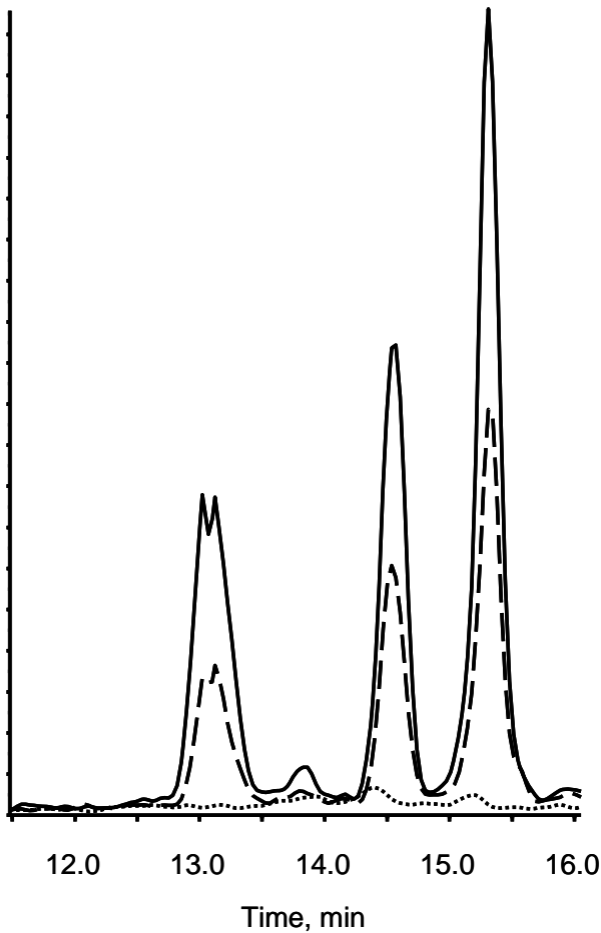

Supplement: pnas_0706044104_5.pdf [file pnas_0706044104_5.pdf]

4 / 10<sup>6</sup> bases

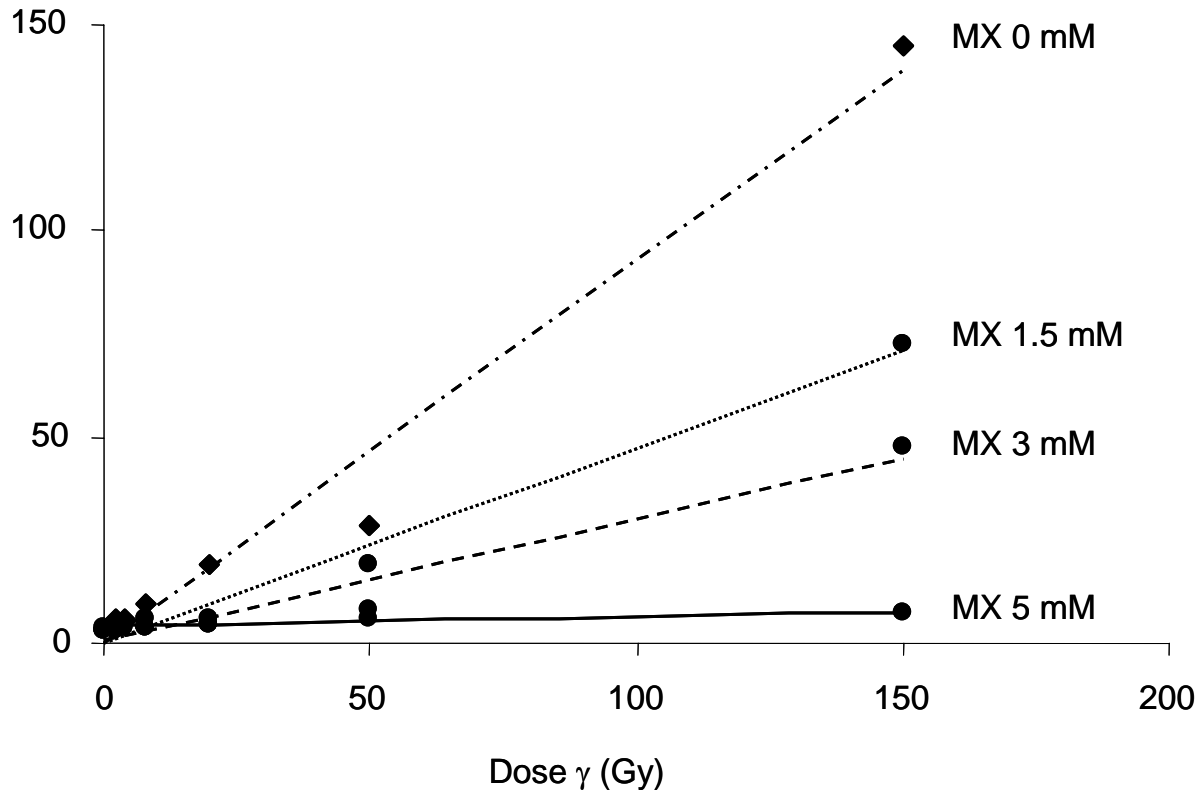

Supplement: pnas_0706044104_6.pdf [file pnas_0706044104_6.pdf]
